# Supplementary material
Source: publisher figshare collection journal article supplement (https://karger.figshare.com/articles/dataset/_/5241433)
Supplement: Supplementary file 1 [file 1]

Figure 2 of the article 'Impact of Beta-Amyloid-Specific Florbetaben PET Imaging on Confidence in Early Diagnosis of Alzheimer's Disease' by Schipke et al. [Dement Geriatr Cogn Disord 2012; 33: 416–422 (DOI: 10.1159/000339367)] has been published with an error. Please see below the correct figure:

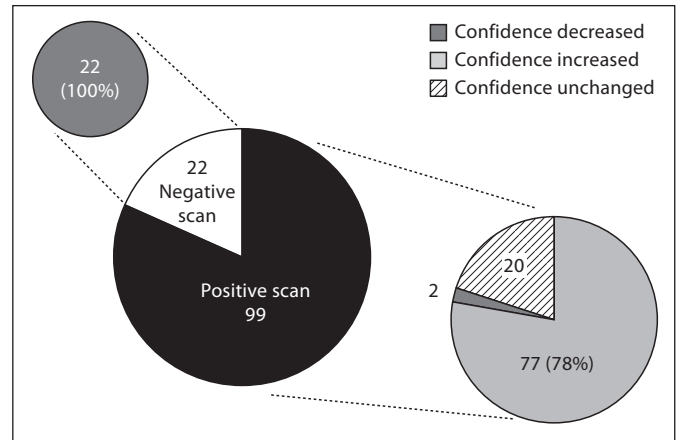

**Fig. 2.** Frequency and direction of change of confidence in the initial diagnosis on receiving the result of the florbetaben PET scan. Numbers are given for the 121 probable AD patients.
